# Supplementary material for: A Survey of Behavioral Health Care Providers on Use and Barriers to Use of Measurement-Based Care
Source: Atypon-hosted journal article supplement (doi:10.1176/appi.ps.202100735), 2023-01-25

**Supplement to “Measuring Measurement: a survey of behavioral health providers on use and barriers to use of measurement-based care”**

**Supplementary Table 1.** Theoretical barriers to use of MBC and the associated survey questions. \*Answers to these questions were re-coded to coincide in meaning with the other questions in the barrier construct - e.g., if a respondent stated they agree with the statement “MBC is useful for tracking symptoms”, they were coded as disagreeing with the statement “MBC is *not* useful for tracking symptoms”. ^removed from this construct in sensitivity analysis.

| Barrier Construct                      | Survey Question                                                                                                                                                                                                                                                                                                          |
|----------------------------------------|--------------------------------------------------------------------------------------------------------------------------------------------------------------------------------------------------------------------------------------------------------------------------------------------------------------------------|
| Low perceived clinical utility         | I don’t think standardized measures are useful<br>Research supports use of measurement-based care in practice*<br>I don’t have measures that suit my patients’ needs and complexity<br>MBC is useful for tracking symptoms*<br>MBC is useful to shared decision-making*<br>MBC is useful for making treatment decisions* |
| Lack of knowledge and self-efficacy    | I don’t know what measurement-based care is<br>I don’t know how to use measurement-based care in my practice<br>I have trouble interpreting the results                                                                                                                                                                  |
| Administrative burden                  | MBC is too time consuming<br>I am not compensated to perform MBC<br>I have trouble integrating measures into my workflow<br>I don’t have an electronic health record or platform to collect results^<br>I am concerned that patients will not complete the measures                                                      |
| Concern with how the data will be used | I am concerned about how the data will be used to judge my clinical skillfulness<br>I am concerned about the how the data will be tied to bonuses                                                                                                                                                                        |

**Supplementary Table 2.** Average values of each barrier index. Values closer to 1 and 5 indicate lesser and greater endorsement of the barrier, respectively. The alternate administrative burden construct does not contain the question on EHR, which was less correlated with the other construct items.

| Barrier construct                       | Mean Index Value | 95% Confidence Interval |
|-----------------------------------------|------------------|-------------------------|
| Low perceived clinical utility          | 2.62             | 2.56 – 2.67             |
| Lack of knowledge and self-efficacy     | 2.02             | 1.97 – 2.07             |
| Administrative burden                   | 3.09             | 3.04 – 3.15             |
| Administrative burden (alternate)       | 3.21             | 3.16 – 3.27             |
| Concerns with how the data will be used | 3.24             | 3.16 – 3.32             |

**Supplementary Table 3.** Reliability (Cronbach’s alpha) and correlation coefficients between barrier indices. Cronbach’s alpha for each index is on the diagonal and correlation coefficients are below the diagonal. These values were calculated using the non-imputed data and listwise deletion. The number of observations is given for each alpha calculation in parentheses. The number of observations used to calculate the correlation matrix was  $N = 889$ . The alternate administrative burden construct does not contain the question on EHR (see Methods in the main text).

|                              | Low perceived utility | Lack of knowledge   | Administrative burden | Administrative burden (alt.) | Data use concerns   |
|------------------------------|-----------------------|---------------------|-----------------------|------------------------------|---------------------|
| Low perceived utility        | 0.874 ( $N = 798$ )   |                     |                       |                              |                     |
| Lack of knowledge            | 0.386                 | 0.756 ( $N = 853$ ) |                       |                              |                     |
| Administrative burden        | 0.546                 | 0.455               | 0.693 ( $N = 773$ )   |                              |                     |
| Administrative burden (alt.) | 0.567                 | 0.417               | 0.941                 | 0.741 ( $N = 793$ )          |                     |
| Data use concerns            | 0.458                 | 0.286               | 0.486                 | 0.514                        | 0.763 ( $N = 791$ ) |

**Supplementary Table 4.** Average marginal effects (in percentage points) of each barrier index on the probability of using MBC with a given percentage of one’s caseload (main analysis). Some respondents did not answer one or more of the questions regarding their opinions of MBC – answers to these questions were imputed using multivariate normal multiple imputation, as described in the main text. Estimates are reported for both unadjusted and adjusted models. The unadjusted models were ordered logit models with the outcome as percentage of caseload with which MBC and each individual barrier index as the predictor. In the fully adjusted models, predictors were sex, Urban Influence Code of primary practice location, race/ethnicity, practice type, license, specialty training, treatment modalities provided, weekly clinical care hours, if the respondent has had training on MBC, the number of years in the mental health field, if the provider bills insurance for insured patients, and the estimated insurance distribution of the provider’s caseload. See the main text and Supplemental Table 1 for the full definition of each predictor. All *p* values were less than 0.001. \*alternate administrative burden construct without EHR question (sensitivity analysis). *N* = 922.

| Barrier                             | Unadjusted Model |                | Adjusted Model |               |
|-------------------------------------|------------------|----------------|----------------|---------------|
|                                     | Estimate         | 95% CI         | Estimate       | 95% CI        |
| Low perceived clinical utility      |                  |                |                |               |
| 0%                                  | 18.7             | 17.1 to 20.4   | 16.7           | 14.9 to 18.5  |
| 1-49%                               | 6.7              | 5.5 to 8.0     | 5.3            | 4.2 to 6.5    |
| 50%                                 | -2.5             | -3.3 to -1.7   | -2.5           | -3.2 to -1.8  |
| 51-99%                              | -9.9             | -11.4 to -8.5  | -8.4           | -9.7 to -7.0  |
| 100%                                | -13.0            | -15.0 to -11.1 | -11.2          | -12.9 to -9.4 |
| Lack of knowledge and self-efficacy |                  |                |                |               |
| 0%                                  | 12.4             | 10.4 to 14.4   | 9.0            | 6.9 to 11.1   |
| 1-49%                               | 4.4              | 3.2 to 5.5     | 2.7            | 1.8 to 3.6    |
| 50%                                 | -2.0             | -2.6 to -1.4   | -1.5           | -1.9 to -1.0  |
| 51-99%                              | -6.8             | -8.1 to -5.5   | -4.6           | -5.8 to -3.4  |
| 100%                                | -8.0             | -9.7 to -6.2   | -5.7           | -7.2 to -4.1  |
| Administrative burden               |                  |                |                |               |
| 0%                                  | 15.5             | 13.5 to 17.5   | 11.8           | 9.8 to 13.8   |
| 1-49%                               | 4.8              | 3.7 to 5.9     | 3.3            | 2.4 to 4.2    |
| 50%                                 | -2.4             | -3.0 to -1.7   | -1.9           | -2.5 to -1.4  |
| 51-99%                              | -8.1             | -9.3 to -6.8   | -5.9           | -7.0 to -4.7  |
| 100%                                | -9.9             | -11.6 to -8.1  | -7.3           | -8.8 to -5.8  |
| Administrative burden (alternate)*  |                  |                |                |               |
| 0%                                  | 15.3             | 13.3 to 17.3   | 12.3           | 10.3 to 14.2  |
| 1-49%                               | 4.6              | 3.5 to 5.7     | 3.3            | 2.4 to 4.2    |
| 50%                                 | -2.3             | -3.0 to -1.7   | -2.0           | -2.6 to -1.5  |
| 51-99%                              | -7.9             | -9.1 to -6.7   | -6.0           | -7.1 to -4.9  |
| 100%                                | -9.7             | -11.4 to -8.0  | -7.5           | -9.0 to -6.1  |
| Data use concerns                   |                  |                |                |               |
| 0%                                  | 10.6             | 8.4 to 12.7    | 7.9            | 5.8 to 10.0   |
| 1-49%                               | 3.4              | 2.5 to 4.3     | 2.2            | 1.5 to 2.9    |
| 50%                                 | -1.8             | -2.3 to -1.2   | -1.3           | -1.8 to -0.9  |
| 51-99%                              | -5.7             | -6.9 to -4.5   | -3.9           | -5.0 to -2.9  |
| 100%                                | -6.5             | -8.1 to -5.0   | -4.8           | -6.2 to -3.4  |

**Supplementary Table 5.** Average marginal effects (in percentage points) of each barrier index on the probability of using MBC with a given percentage of one’s caseload (sensitivity analysis). Instead of using multiple imputation, the 30 respondents who did not answer any questions for one or more barrier indices were dropped (listwise deletion). Estimates are reported for both unadjusted and adjusted models. The unadjusted models were ordered logit models with the outcome as percentage of caseload with which MBC and each individual barrier index as the predictor. In the fully adjusted models, predictors were sex, Urban Influence Code of primary practice location, race/ethnicity, practice type, license, specialty training, treatment modalities provided, weekly clinical care hours, if the respondent has had training on MBC, the number of years in the mental health field, if the provider bills insurance for insured patients, and the estimated insurance distribution of the provider’s caseload. See the main text and Supplemental Table 1 for the full definition of each predictor. All *p* values were less than 0.001. *N* = 892.

| Barrier                                    | Unadjusted Model |                | Adjusted Model |               |
|--------------------------------------------|------------------|----------------|----------------|---------------|
|                                            | Estimate         | 95% CI         | Estimate       | 95% CI        |
| <b>Low perceived clinical utility</b>      |                  |                |                |               |
| 0%                                         | 18.6             | 16.9 to 20.3   | 16.7           | 14.9 to 18.4  |
| 1-49%                                      | 7.0              | 5.7 to 8.2     | 5.6            | 4.4 to 6.8    |
| 50%                                        | -2.5             | -3.3 to -1.7   | -2.5           | -3.2 to -1.8  |
| 51-99%                                     | -10.0            | -11.5 to -8.6  | -8.5           | -9.8 to -7.1  |
| 100%                                       | -13.0            | -15.0 to -11.0 | -11.3          | -13.0 to -9.5 |
| <b>Lack of knowledge and self-efficacy</b> |                  |                |                |               |
| 0%                                         | 12.1             | 10.0 to 14.1   | 8.8            | 6.7 to 10.9   |
| 1-49%                                      | 4.4              | 3.2 to 5.5     | 2.7            | 1.8 to 3.5    |
| 50%                                        | -2.0             | -2.6 to -1.4   | -1.5           | -2.0 to -1.0  |
| 51-99%                                     | -6.7             | -8.0 to -5.4   | -4.4           | -5.7 to -3.3  |
| 100%                                       | -7.7             | -9.5 to -6.0   | -5.5           | -7.0 to -4.0  |
| <b>Administrative burden</b>               |                  |                |                |               |
| 0%                                         | 15.3             | 13.4 to 17.3   | 11.7           | 9.7 to 13.7   |
| 1-49%                                      | 4.9              | 3.8 to 6.0     | 3.3            | 2.4 to 4.3    |
| 50%                                        | -2.4             | -3.1 to -1.7   | -2.0           | -2.5 to -1.4  |
| 51-99%                                     | -8.1             | -9.3 to -6.8   | -5.9           | -7.0 to -4.7  |
| 100%                                       | -9.8             | -11.5 to -8.0  | -7.2           | -8.7 to -5.7  |
| <b>Data use concerns</b>                   |                  |                |                |               |
| 0%                                         | 10.7             | 8.7 to 12.8    | 8.1            | 6.1 to 10.1   |
| 1-49%                                      | 3.5              | 2.6 to 4.5     | 2.3            | 1.5 to 3.0    |
| 50%                                        | -1.8             | -2.4 to -1.3   | -1.4           | -1.9 to -1.0  |
| 51-99%                                     | -5.8             | -7.0 to -4.7   | -4.1           | -5.1 to -3.0  |
| 100%                                       | -6.6             | -8.2 to -5.1   | -4.9           | -6.2 to -3.6  |

**Supplementary Table 6.** Average marginal effects (AMEs) in percentage points of provider and practice characteristics on the probability of using MBC with a given percentage of one’s caseload, after adjusting for barrier indices.

| Predictor                           | AME on Percentage of Caseload with which MBC is used |        |        |        |        | Overall Odds Ratio |
|-------------------------------------|------------------------------------------------------|--------|--------|--------|--------|--------------------|
|                                     | 0%                                                   | 1-49%  | 50%    | 51-99% | 100%   |                    |
| <b>Barrier</b>                      |                                                      |        |        |        |        |                    |
| Low perceived clinical utility      | 14.2**                                               | 4.3**  | -2.2** | -7.0** | -9.4** | 0.32**             |
| Lack of knowledge and self-efficacy | 2.2**                                                | 0.7**  | -0.3** | -1.1** | -1.4** | 0.84**             |
| Administrative burden               | 3.8**                                                | 1.1**  | -0.6** | -1.9** | -2.5** | 0.74**             |
| Data use concerns                   | -0.2                                                 | -0.1   | 0.0    | 0.1    | 0.1    | 1.01               |
| <b>Provider Demographics</b>        |                                                      |        |        |        |        |                    |
| <b>Sex</b>                          |                                                      |        |        |        |        |                    |
| Female (base level)                 | -                                                    | -      | -      | -      | -      | -                  |
| Male                                | 1.7                                                  | 0.5    | -0.3   | -0.8   | -1.1   | 0.87               |
| Nonbinary                           | 3.3                                                  | 0.9    | -0.6   | -1.6   | -2.0   | 0.78               |
| <b>Race/Ethnicity</b>               |                                                      |        |        |        |        |                    |
| White                               | 1.8                                                  | 0.6    | -0.3   | -0.9   | -1.2   | 0.87               |
| Black                               | -2.6                                                 | -0.9   | 0.4    | 1.3    | 1.8    | 1.24               |
| Latino/Latina                       | 4.7                                                  | 1.1    | -0.8   | -2.2   | -2.7   | 0.70               |
| Other                               | -2.6                                                 | -0.9   | 0.4    | 1.3    | 1.8    | 1.24               |
| Not specified                       | -5.8                                                 | -2.2   | 0.7    | 2.8    | 4.5    | 1.64               |
| <b>Urbanity</b>                     |                                                      |        |        |        |        |                    |
| Large metro (base level)            | -                                                    | -      | -      | -      | -      | -                  |
| Small metro                         | -0.2                                                 | -0.1   | 0.0    | 0.1    | 0.1    | 1.02               |
| Non-metro                           | -5.5**                                               | -2.1*  | 0.7**  | 2.8**  | 4.1*   | 1.59**             |
| <b>Practice Type</b>                |                                                      |        |        |        |        |                    |
| Solo practice                       | -3.4                                                 | -0.9   | 0.6    | 1.6    | 2.2    | 1.31               |
| Small group (<10 providers)         | -7.1                                                 | -2.7   | 0.9**  | 3.6    | 5.3    | 1.81               |
| Large group (>= 10 providers)       | -9.0**                                               | -4.0   | 0.8**  | 4.6**  | 7.6    | 2.21*              |
| Facility-based                      | -3.0                                                 | -1.1   | 0.4    | 1.5    | 2.2    | 1.28               |
| <b>License</b>                      |                                                      |        |        |        |        |                    |
| Masters                             | -0.2                                                 | -0.1   | 0.0    | 0.1    | 0.1    | 1.02               |
| Advanced Practice                   | 11.9                                                 | 1.5**  | -2.4   | -5.3   | -5.8** | 0.42               |
| PhD/PsyD                            | 7.5                                                  | 1.7**  | -1.4   | -3.6   | -4.3*  | 0.57               |
| MD                                  | 11.4                                                 | 1.5**  | -2.3   | -5.1   | -5.6   | 0.44               |
| Other                               | 1.4                                                  | 0.4    | -0.2   | -0.7   | -0.9   | 0.90               |
| <b>Specialty Training</b>           |                                                      |        |        |        |        |                    |
| Generalist <sup>#</sup>             | 1.9                                                  | 0.6    | -0.3   | -0.9   | -1.2   | 0.86               |
| Trauma                              | 1.1                                                  | 0.3    | -0.2   | -0.6   | -0.8   | 0.91               |
| Substance use disorder <sup>#</sup> | -2.7                                                 | -0.9   | 0.4    | 1.4    | 1.9    | 1.25               |
| Child/adolescent                    | -1.3                                                 | -0.4   | -0.2   | 0.6    | 0.9    | 1.11               |
| Geriatrics                          | 5.4                                                  | 1.2**  | -1.0   | -2.6   | -3.1*  | 0.66               |
| Mood disorders <sup>#</sup>         | -4.8**                                               | -1.4** | 0.8**  | 2.4**  | 3.1**  | 1.46**             |
| Anxiety disorders                   | 0.7                                                  | 0.2    | -0.1   | -0.3   | -0.4   | 0.95               |
| Women's mental health               | -0.8                                                 | -0.2   | 0.1    | 0.4    | 0.5    | 1.06               |
| Serious mental illness              | 0.2                                                  | 0.1    | 0.0    | -0.1   | -0.1   | 0.98               |
| Other                               | -1.9                                                 | -0.6   | 0.3    | 1.0    | 1.3    | 1.17               |

|                                                 |        |        |        |        |        |        |
|-------------------------------------------------|--------|--------|--------|--------|--------|--------|
| Modalities provided                             |        |        |        |        |        |        |
| Medication management                           | -5.6   | -2.2   | 0.7*   | 2.8    | 4.3    | 1.61   |
| Medication-assisted treatment (OUD)             | -4.4   | -1.7   | 0.6    | 2.2    | 3.3    | 1.44   |
| CBT                                             | 3.3    | 1.1    | -0.5   | -1.6   | -2.4   | 0.76   |
| DBT                                             | 0.6    | 0.2    | -0.1   | -0.3   | -0.4   | 0.96   |
| Acceptance and commitment therapy               | -4.4** | -1.5** | 0.6**  | 2.2**  | 3.1**  | 1.43** |
| Psychodynamic/ psychoanalytic                   | 0.8    | 0.2    | -0.1   | -0.4   | -0.5   | 0.94   |
| Other                                           | 1.6    | 0.5    | -0.3   | -0.8   | -1.0   | 0.88   |
| Care hours <sup>^</sup>                         | -2.3** | -0.7** | 0.4**  | 1.1**  | 1.5**  | 1.20** |
| Have had training on MBC                        | -5.6** | -1.6** | 1.0**  | 2.8**  | 3.4**  | 1.54** |
| Years in field                                  |        |        |        |        |        |        |
| Less than 5 (base level)                        | -      | -      | -      | -      | -      | -      |
| Between 5 and 10                                | 6.2**  | 3.4*   | -0.4*  | -3.3** | -6.0*  | 0.56** |
| Between 10 and 20                               | 9.8**  | 4.6**  | -0.9** | -5.0** | -8.4** | 0.42** |
| More than 20                                    | 11.4** | 5.0**  | -1.2** | -5.8** | -9.3** | 0.37** |
| Bill insurance for insured patients?            |        |        |        |        |        |        |
| Yes, all patients (base level)                  | -      | -      | -      | -      | -      | -      |
| No, only certain insurance types                | 1.7    | 0.5    | -0.3   | -0.8   | -1.1   | 0.87   |
| No, I do not bill for any patients              | 7.9    | 1.6*   | -1.5   | -3.7   | -4.3   | 0.55   |
| Insurance distribution of caseload <sup>^</sup> |        |        |        |        |        |        |
| Medicaid                                        | -0.1   | 0.0    | 0.0    | 0.1    | 0.1    | 1.01   |
| Medicare                                        | 0.0    | 0.0    | 0.0    | 0.0    | 0.0    | 1.00   |
| Blue Cross/Blue Shield                          | 0.2    | 0.1    | 0.0    | -0.1   | -0.1   | 0.98   |
| Other private                                   | -0.7   | -0.2   | 0.1    | 0.3    | 0.4    | 1.05   |
| Out-of-pocket                                   | 0.4    | 0.1    | -0.1   | -0.2   | -0.3   | 0.97   |
| State Health Plan                               | 0.0    | 0.0    | 0.0    | 0.0    | 0.0    | 1.00   |
| Tricare (omitted due to collinearity)           | -      | -      | -      | -      | -      | -      |

\*indicates  $p$  value less than 0.10; \*\*indicates  $p$  value less than 0.05; <sup>^</sup>continuous variable with average marginal effect expressed as percentage-point change in probability per each 10 additional units of the independent variable (e.g., 10 additional weekly clinical care hours or 10 percentage point increase in caseload with specific type of insurance). #Variable for which interpretation is substantially different compared to the unmediated model.

**Supplementary Figure 1:** Number of respondents reporting using measurement-based care with 0%, 1-49%, 50%, 51-99%, or 100% of their caseload (N = 922)

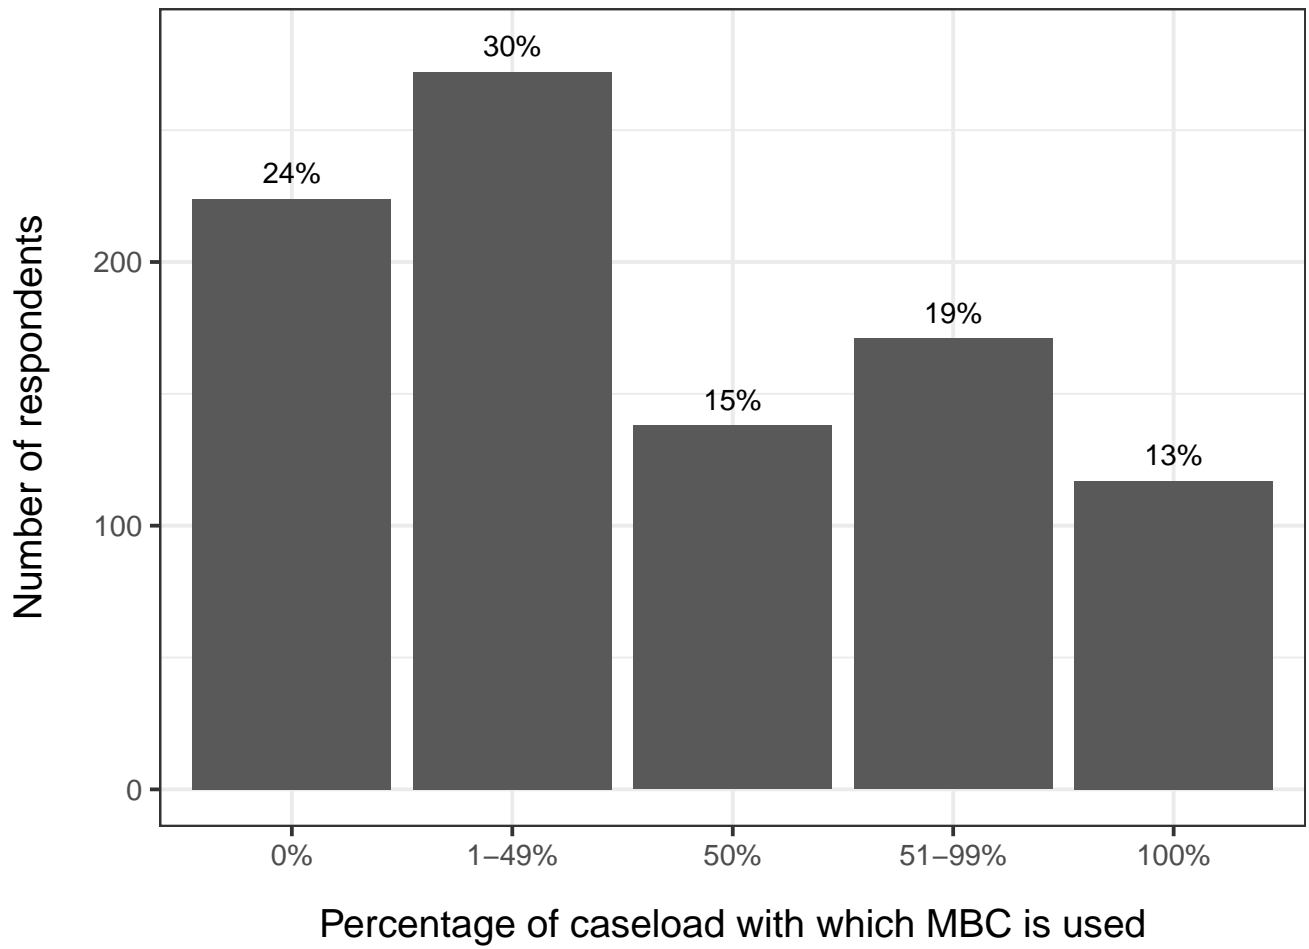

Supplement: appi.ps.202100735.ds001.pdf [file appi.ps.202100735.ds001.pdf]
